# Supplementary material
Source: PubMed Central journal article supplement (PMC10225361)
Supplement: NIHMS1894815-supplement-8.pdf [file NIHMS1894815-supplement-8.pdf]

### Method S1: Schematic for NO-DTB synthesis and compound authentication, related to STAR Methods.

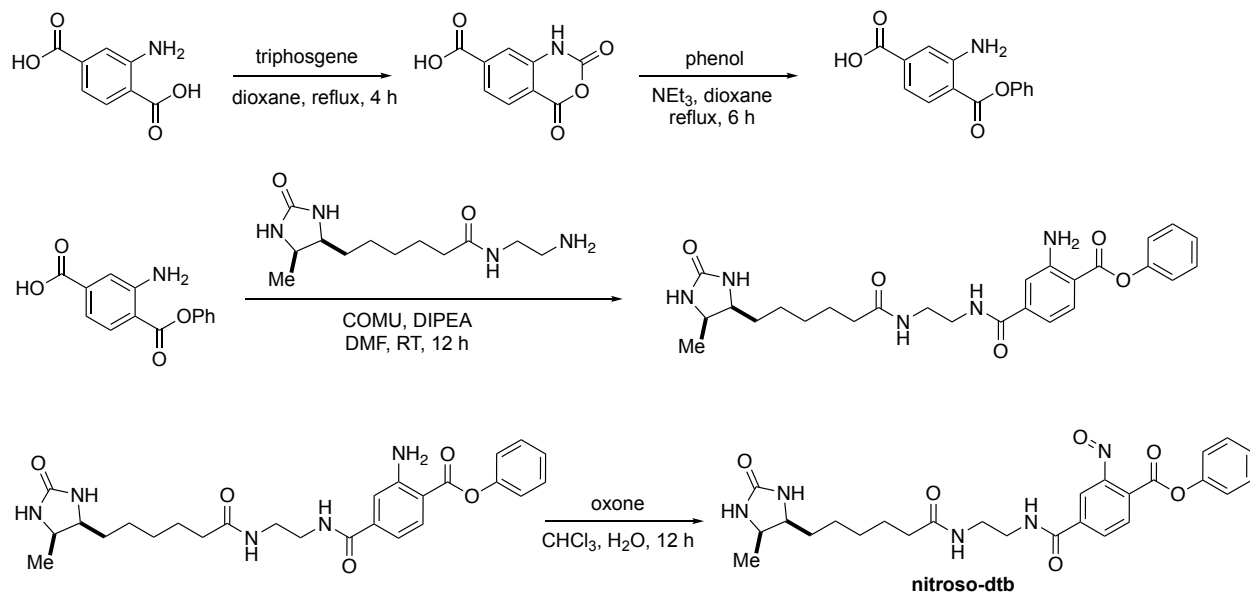

Figure MS 1A. Synthesis of Nitroso-DTB.

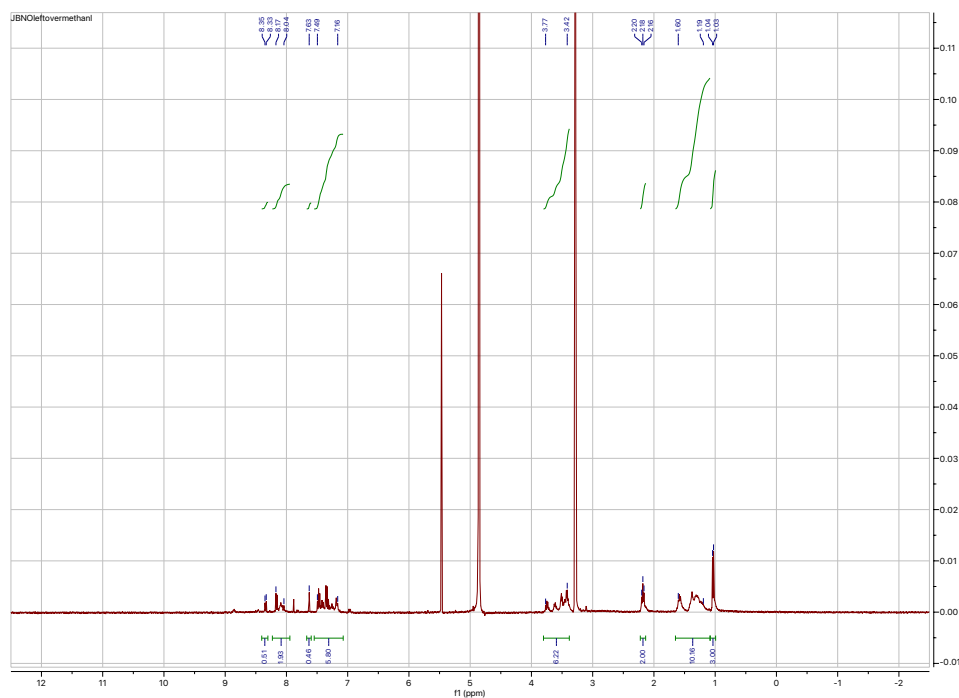

Figure MS 1B.  $^1\text{H}$  NMR of Nitroso-DTB.

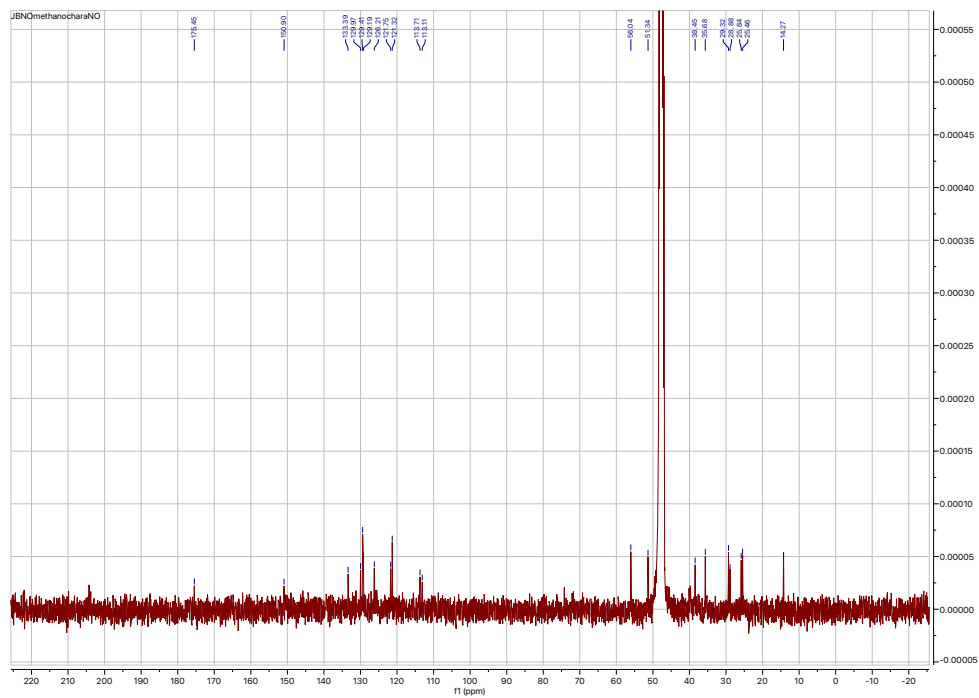

Figure MS 1C.  $^{13}\text{C}$  NMR of Nitroso-DTB.
