# Supplementary material
Source: PubMed Central journal article supplement (PMC10225361)

A

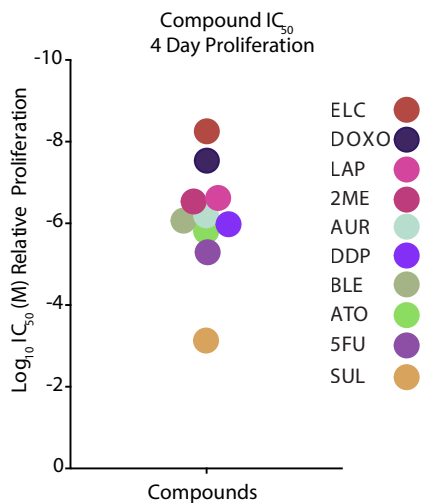

B

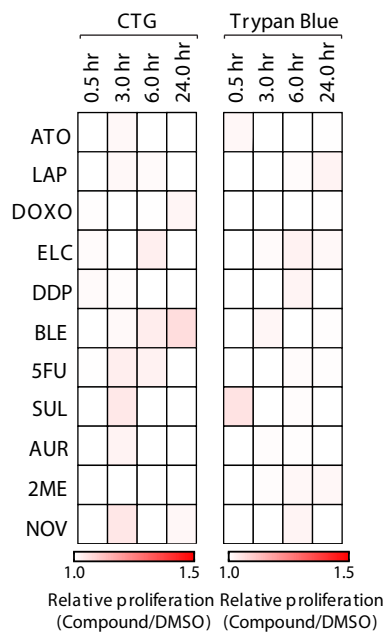

C

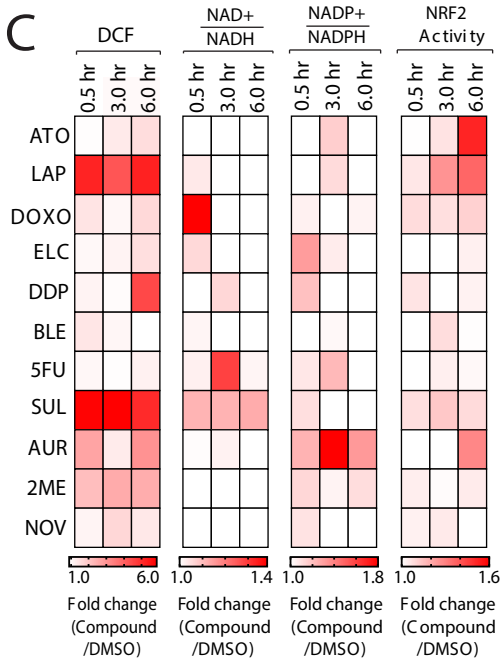

D

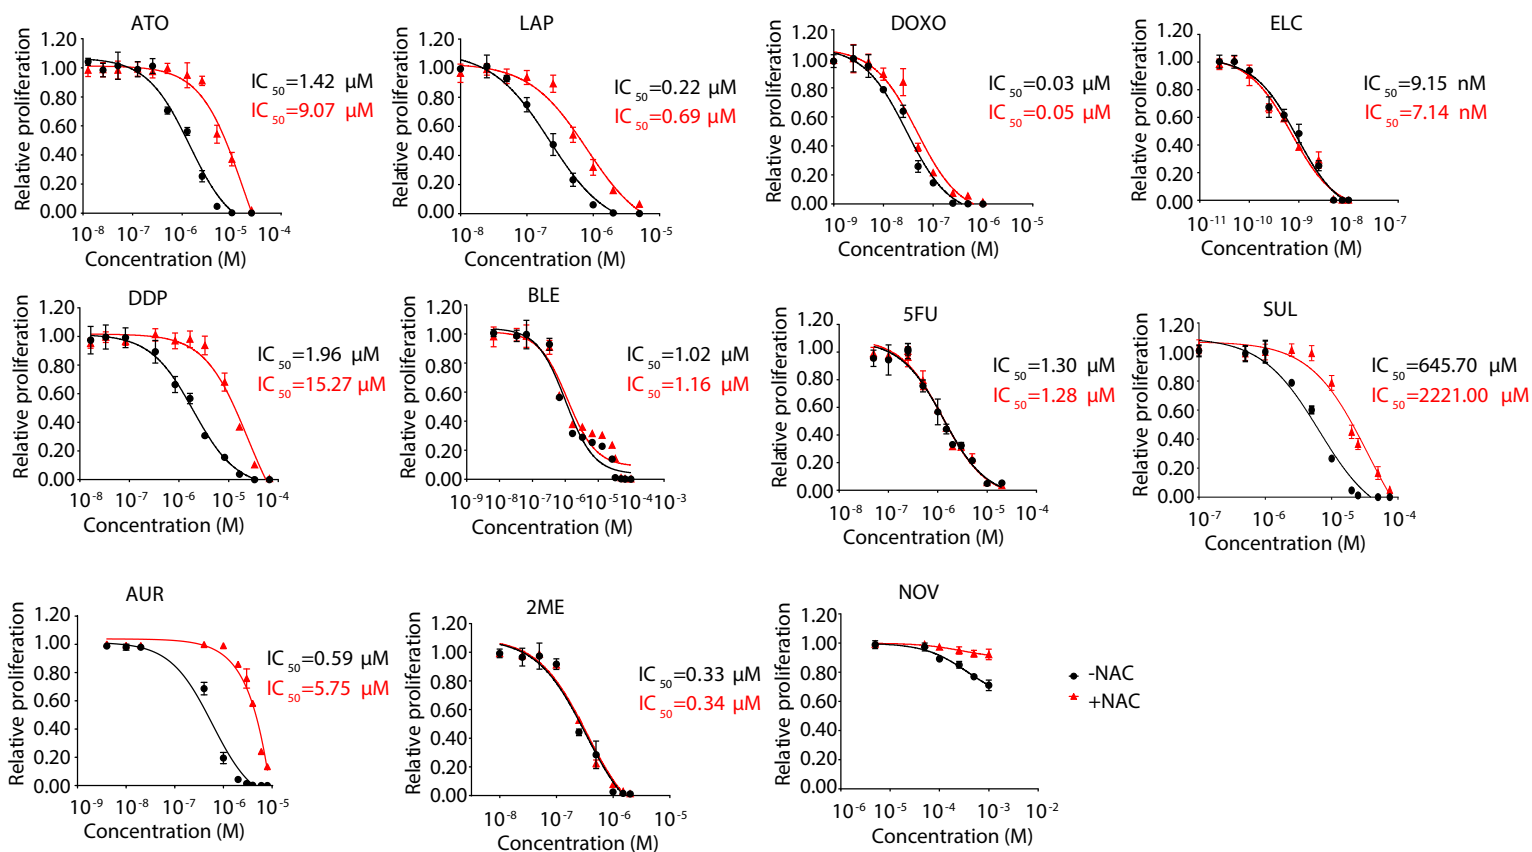

Supplement: NIHMS1894815-supplement-1.pdf [file NIHMS1894815-supplement-1.pdf]

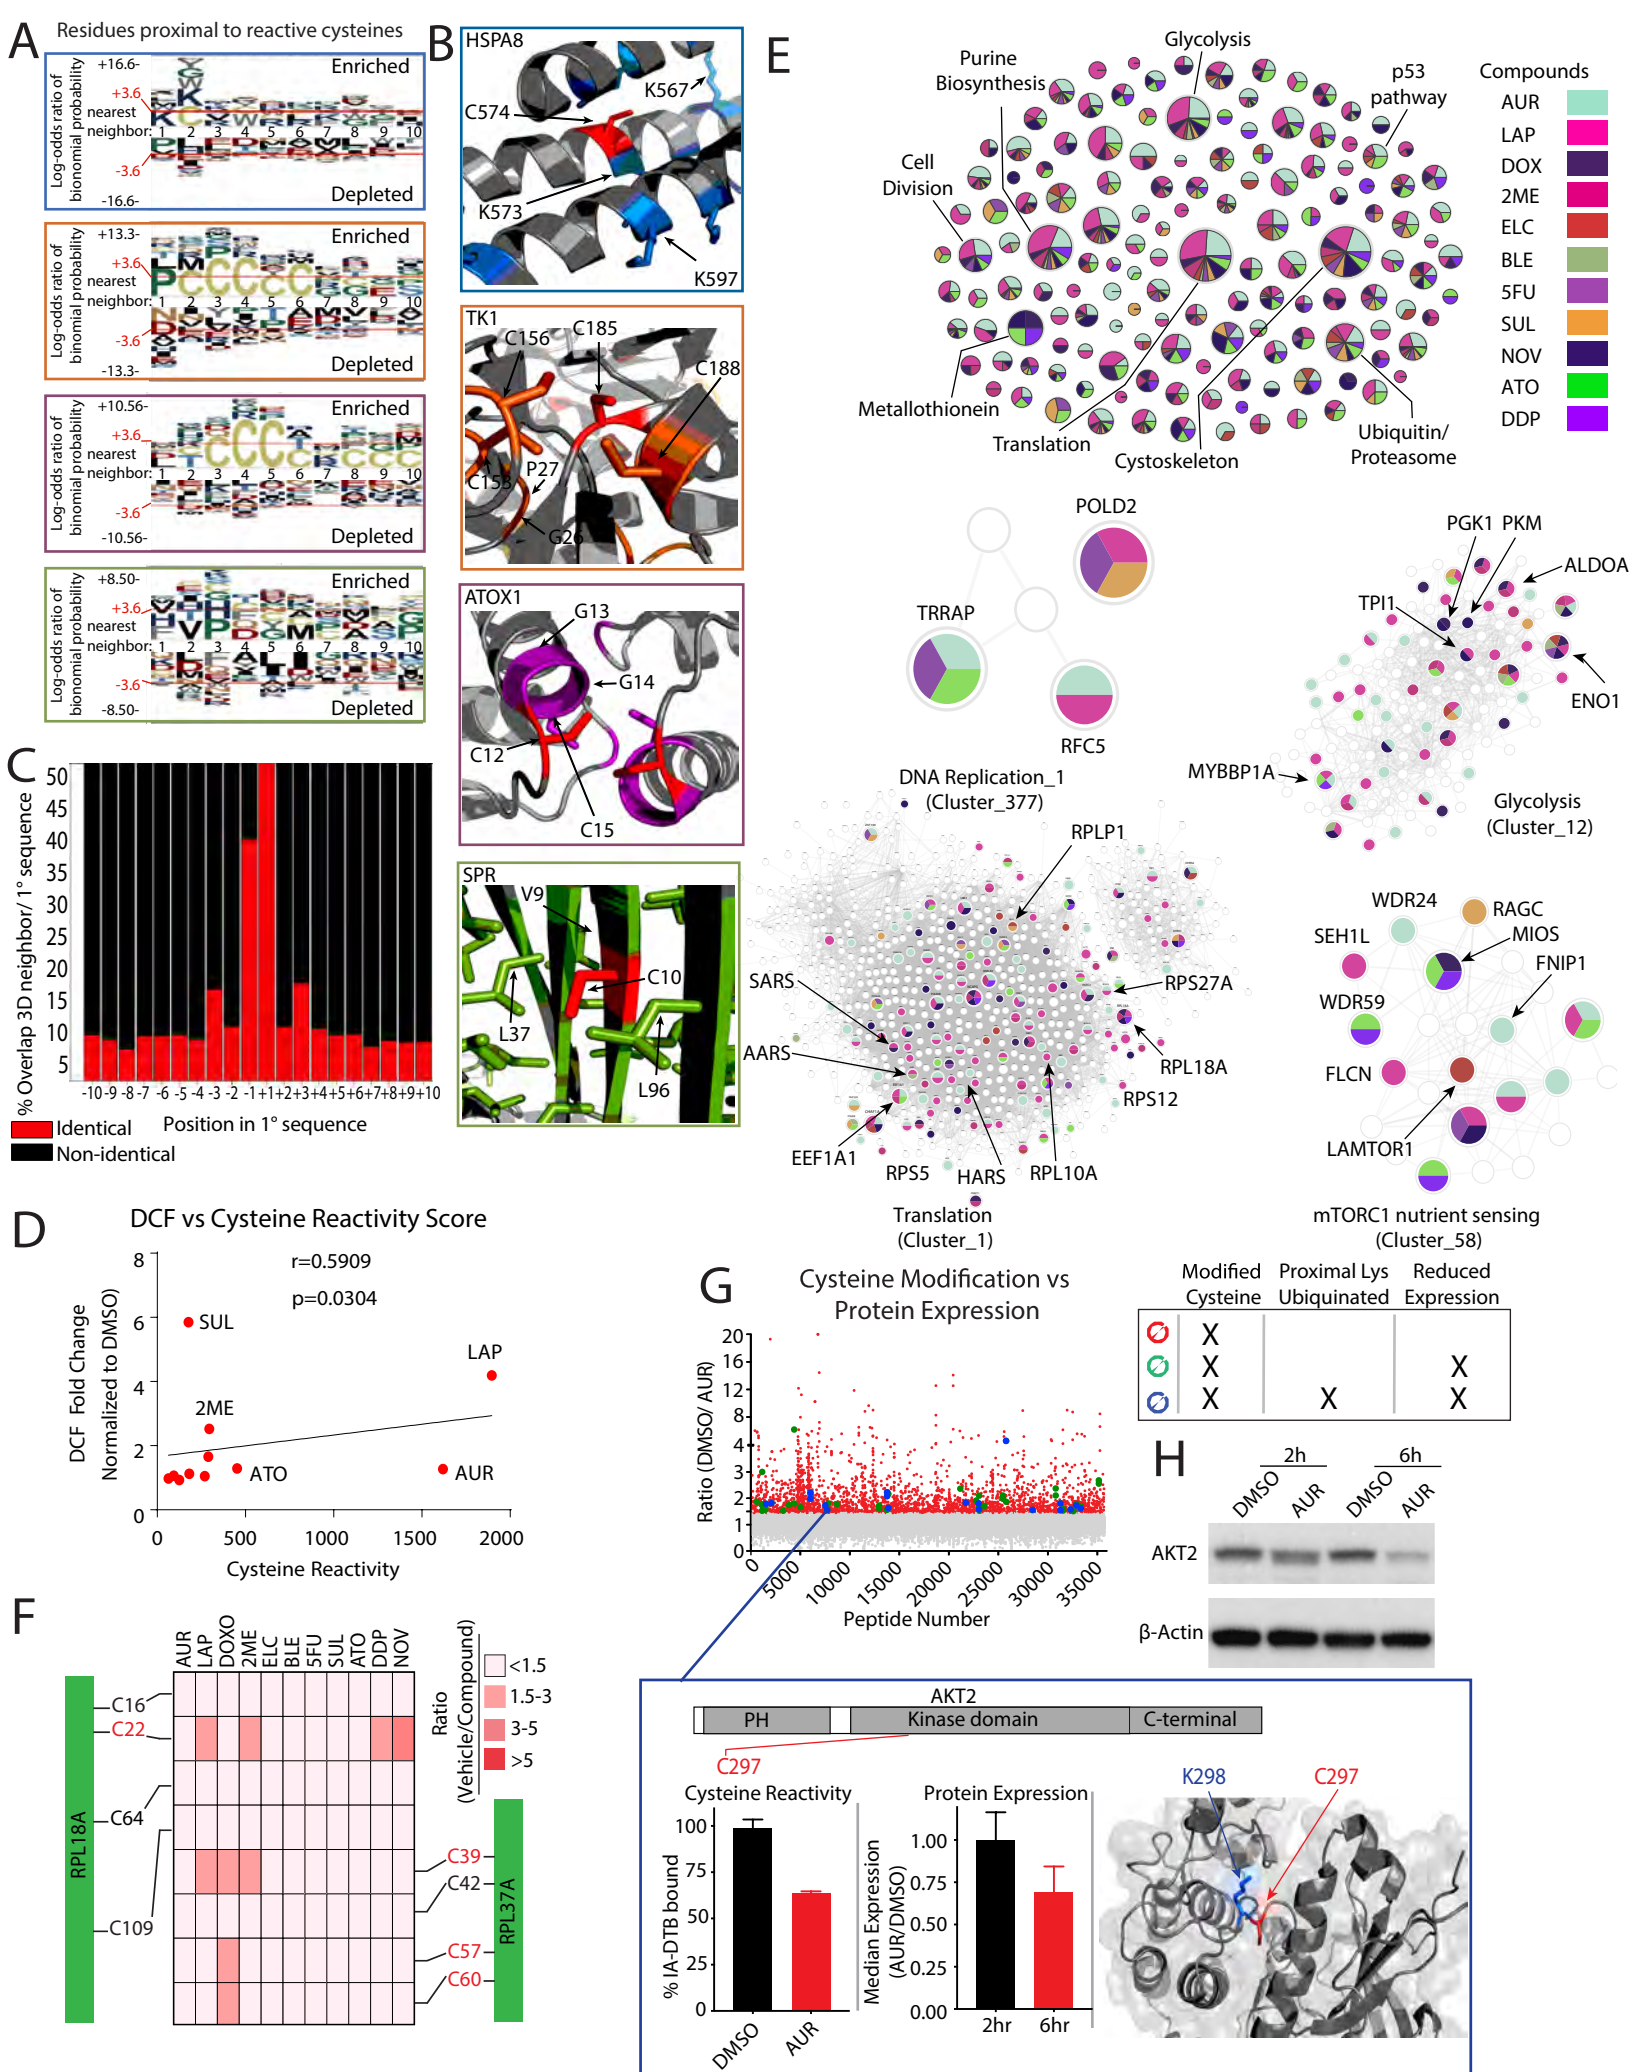

Supplement: NIHMS1894815-supplement-2.pdf [file NIHMS1894815-supplement-2.pdf]

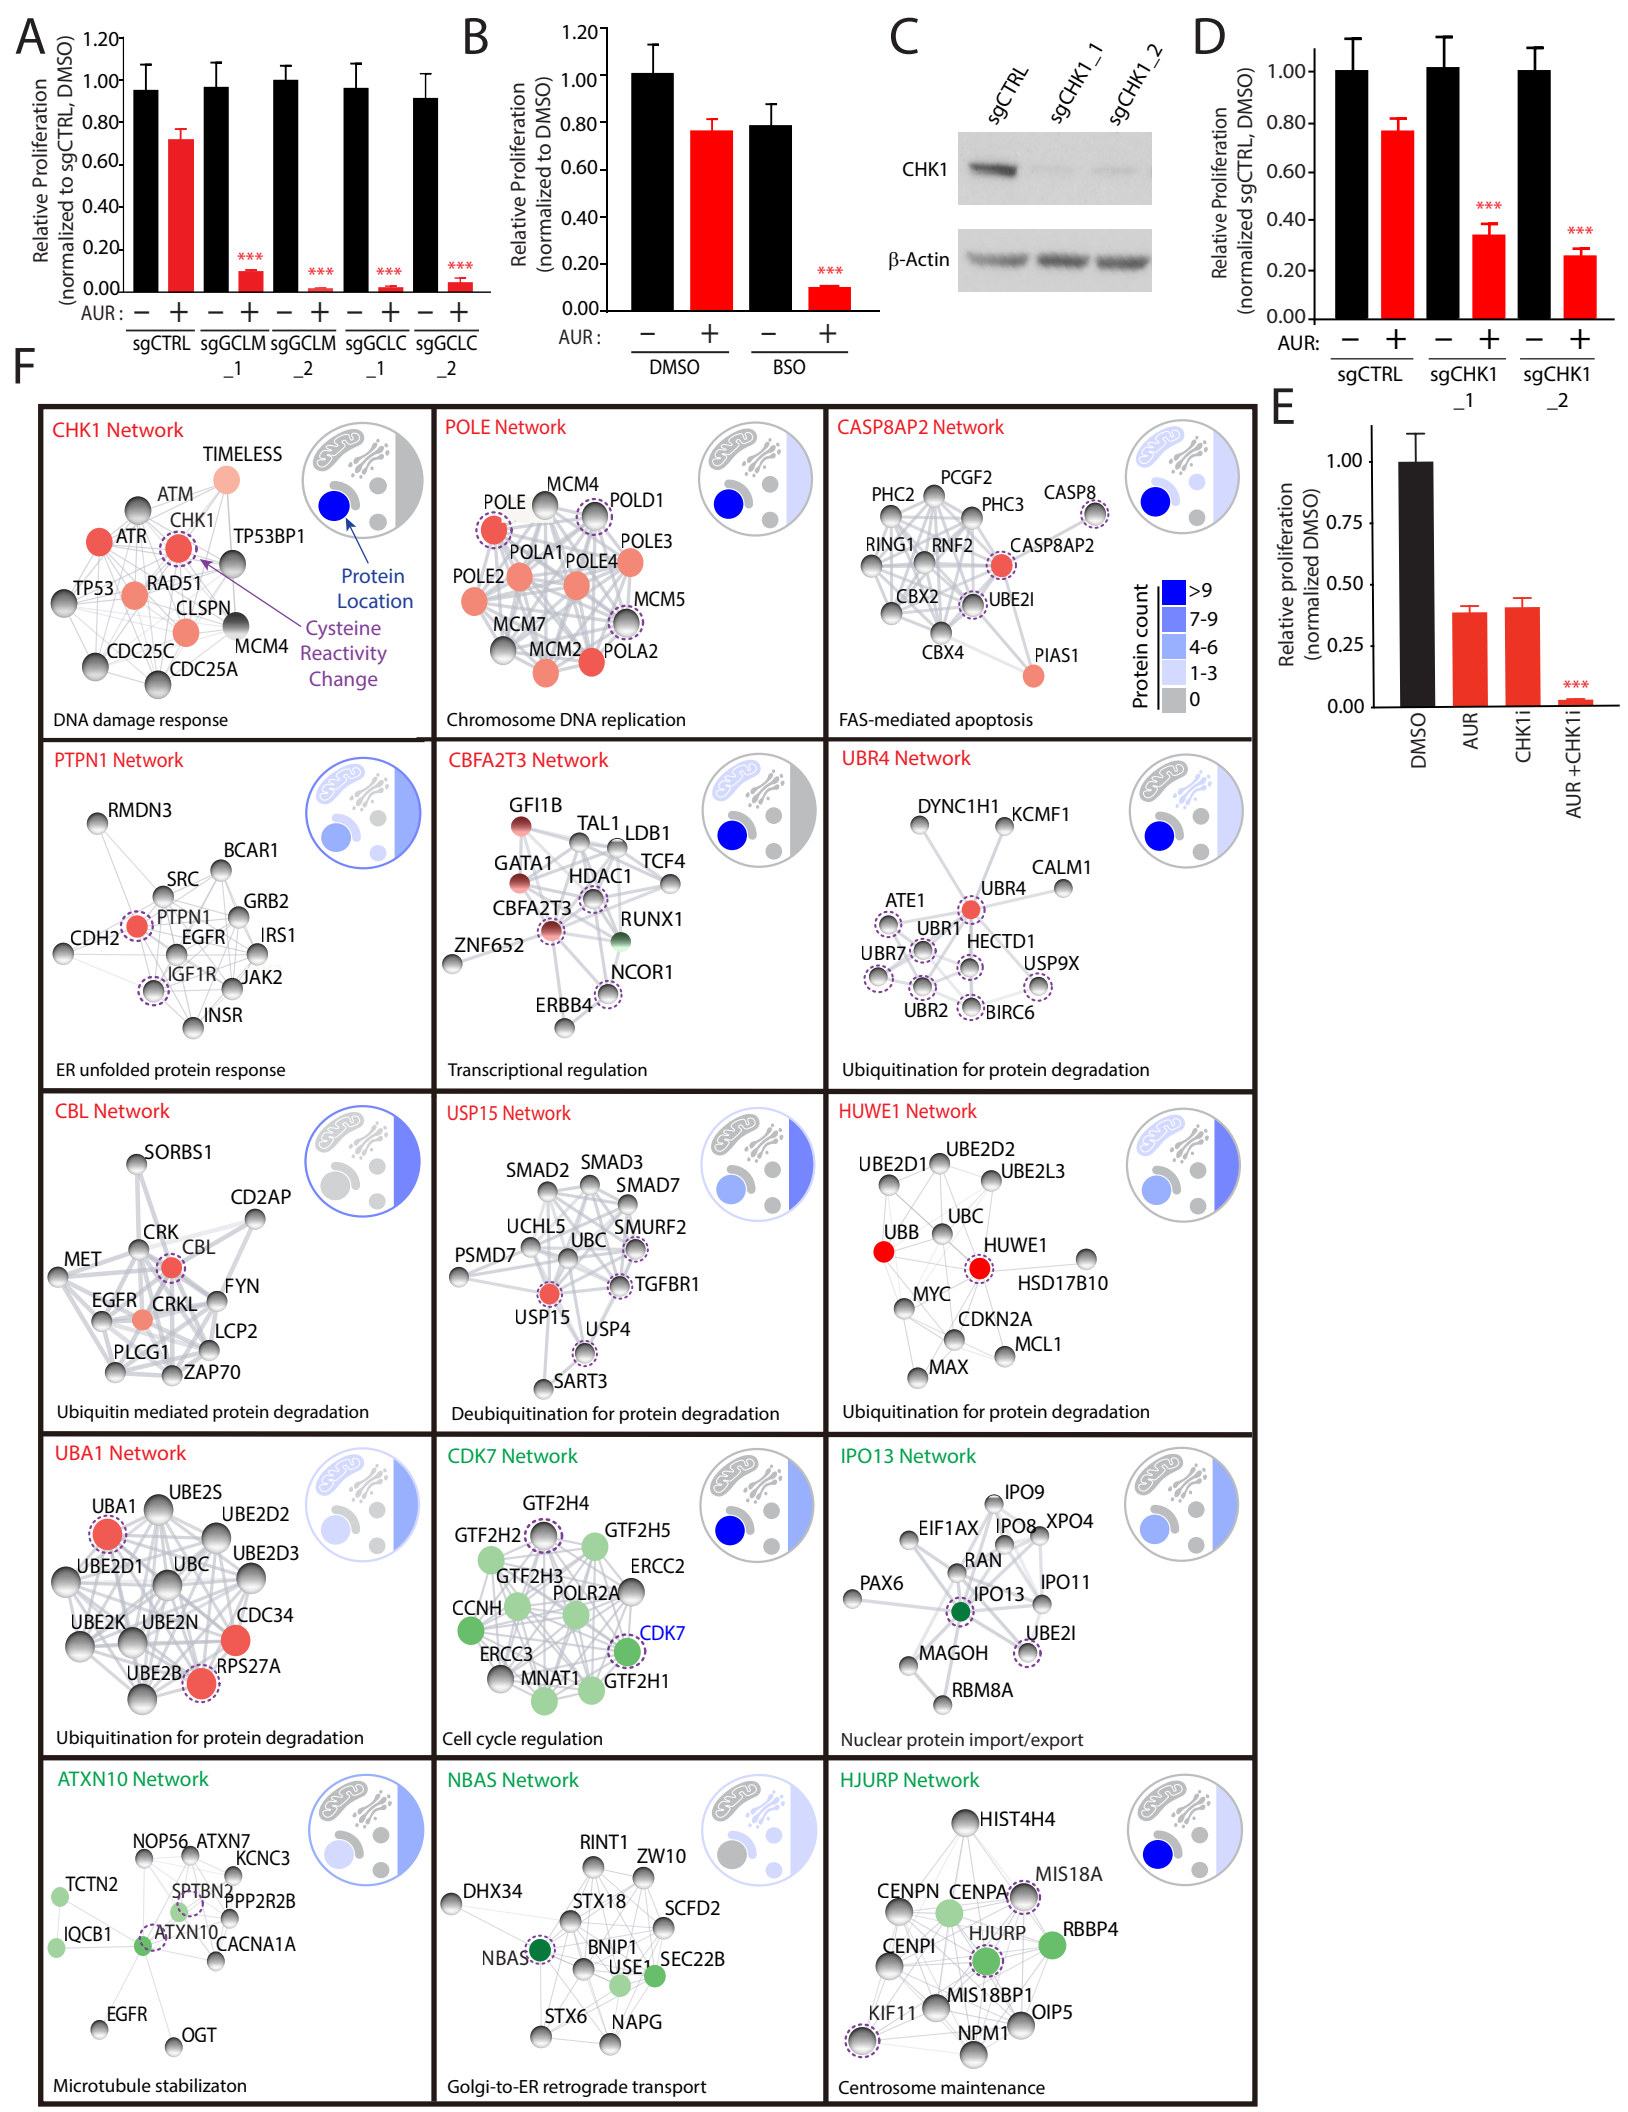

Supplement: NIHMS1894815-supplement-3.pdf [file NIHMS1894815-supplement-3.pdf]

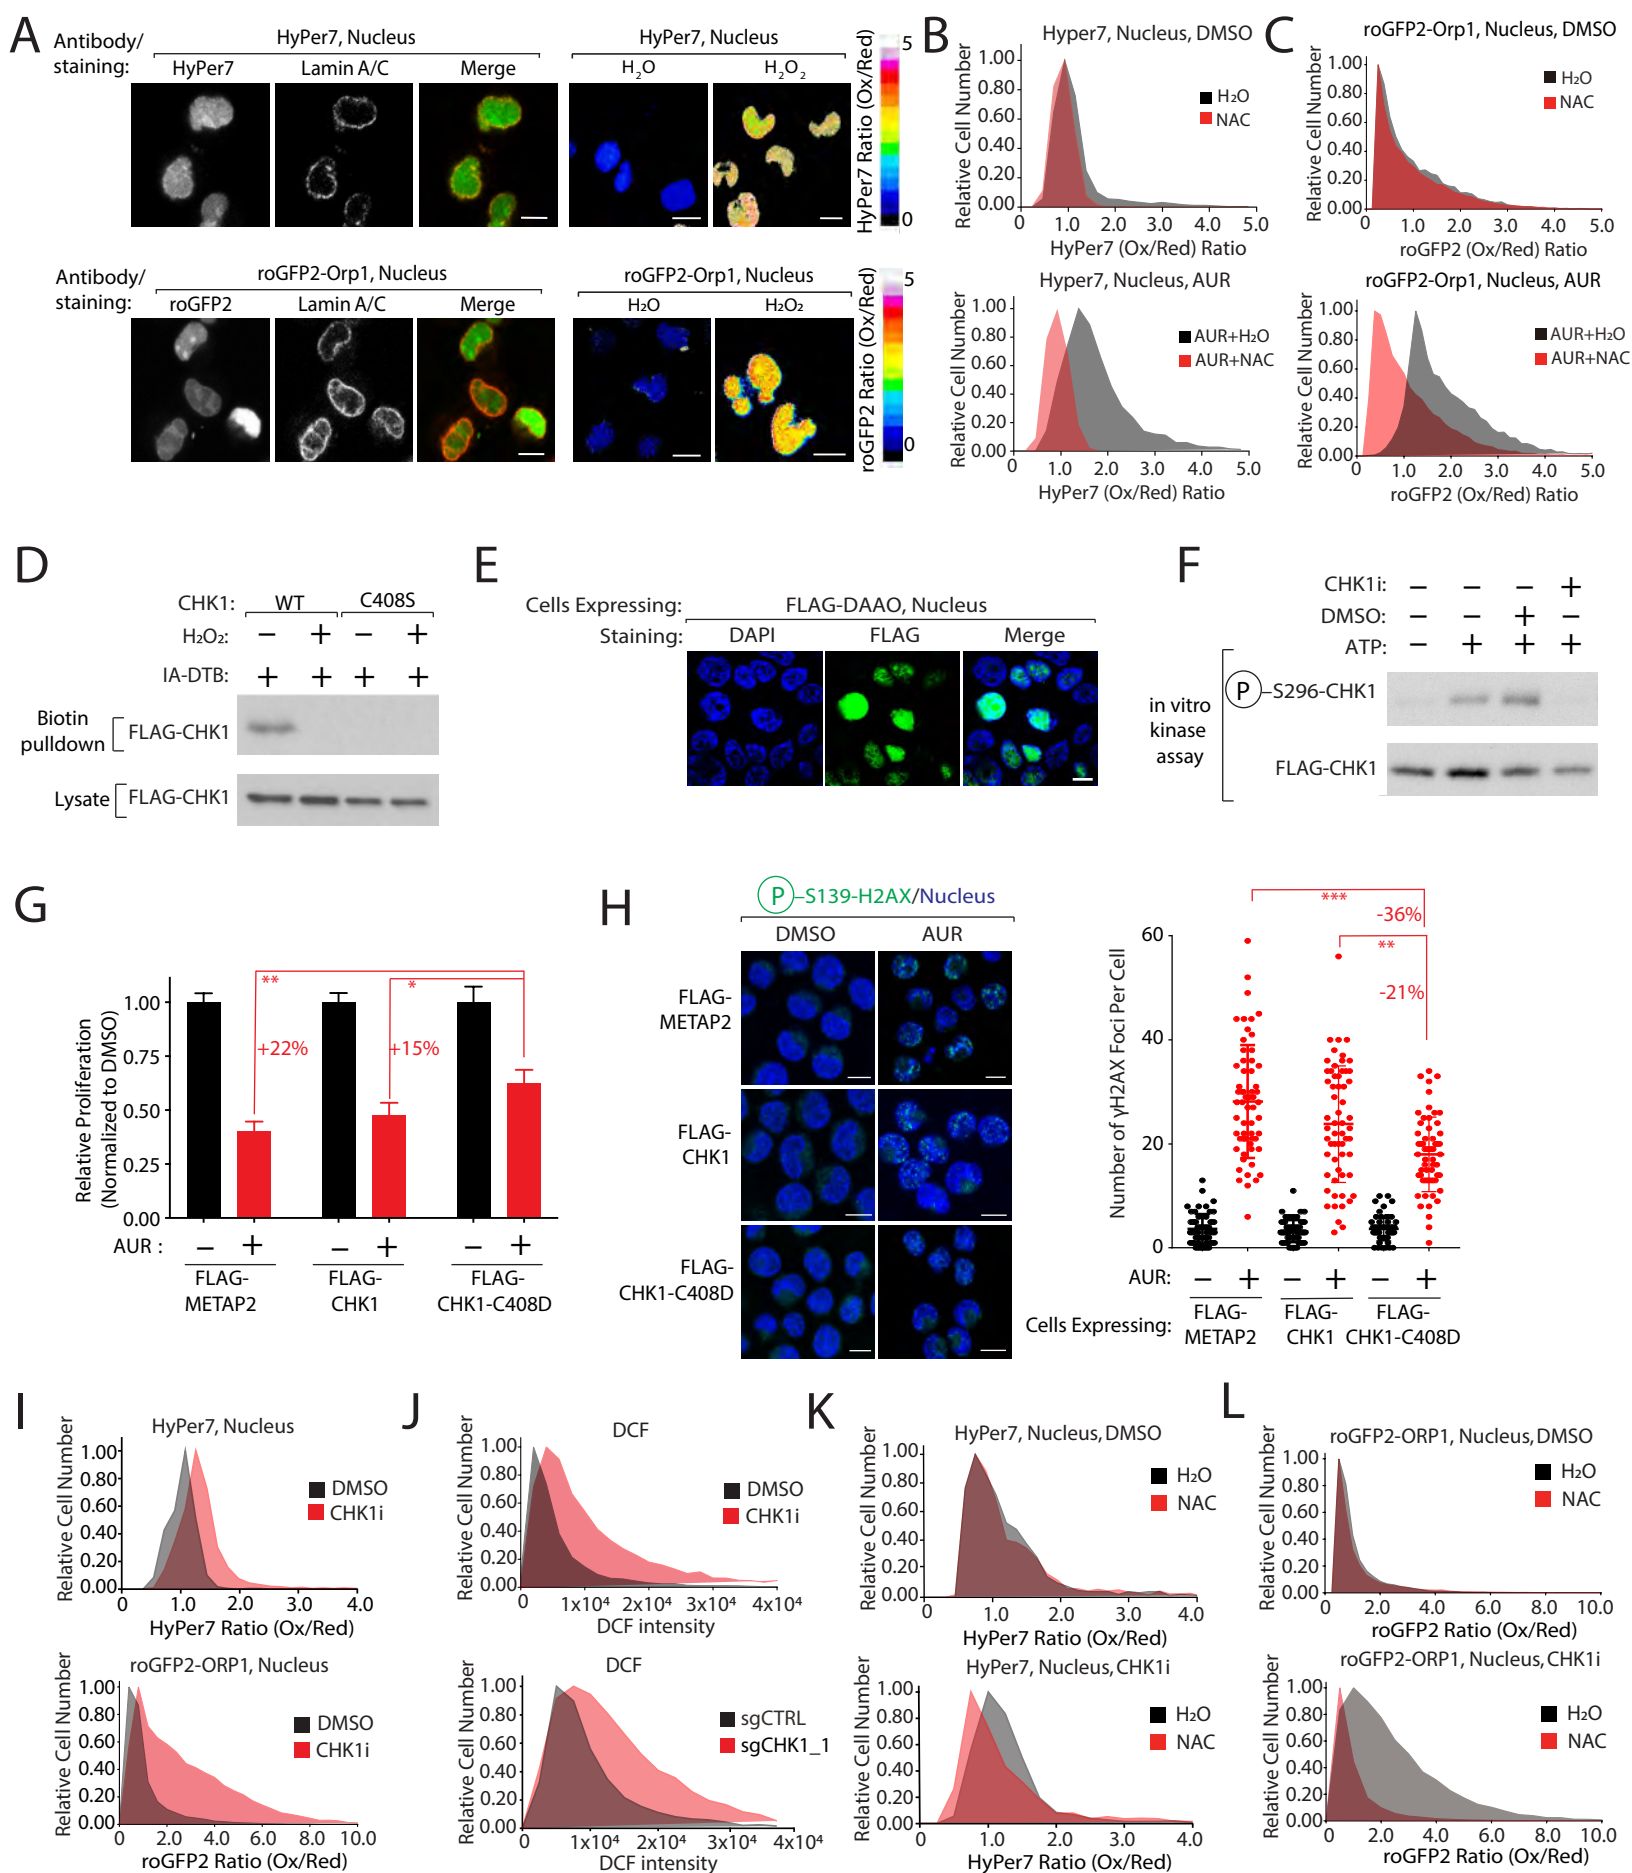

Supplement: NIHMS1894815-supplement-4.pdf [file NIHMS1894815-supplement-4.pdf]

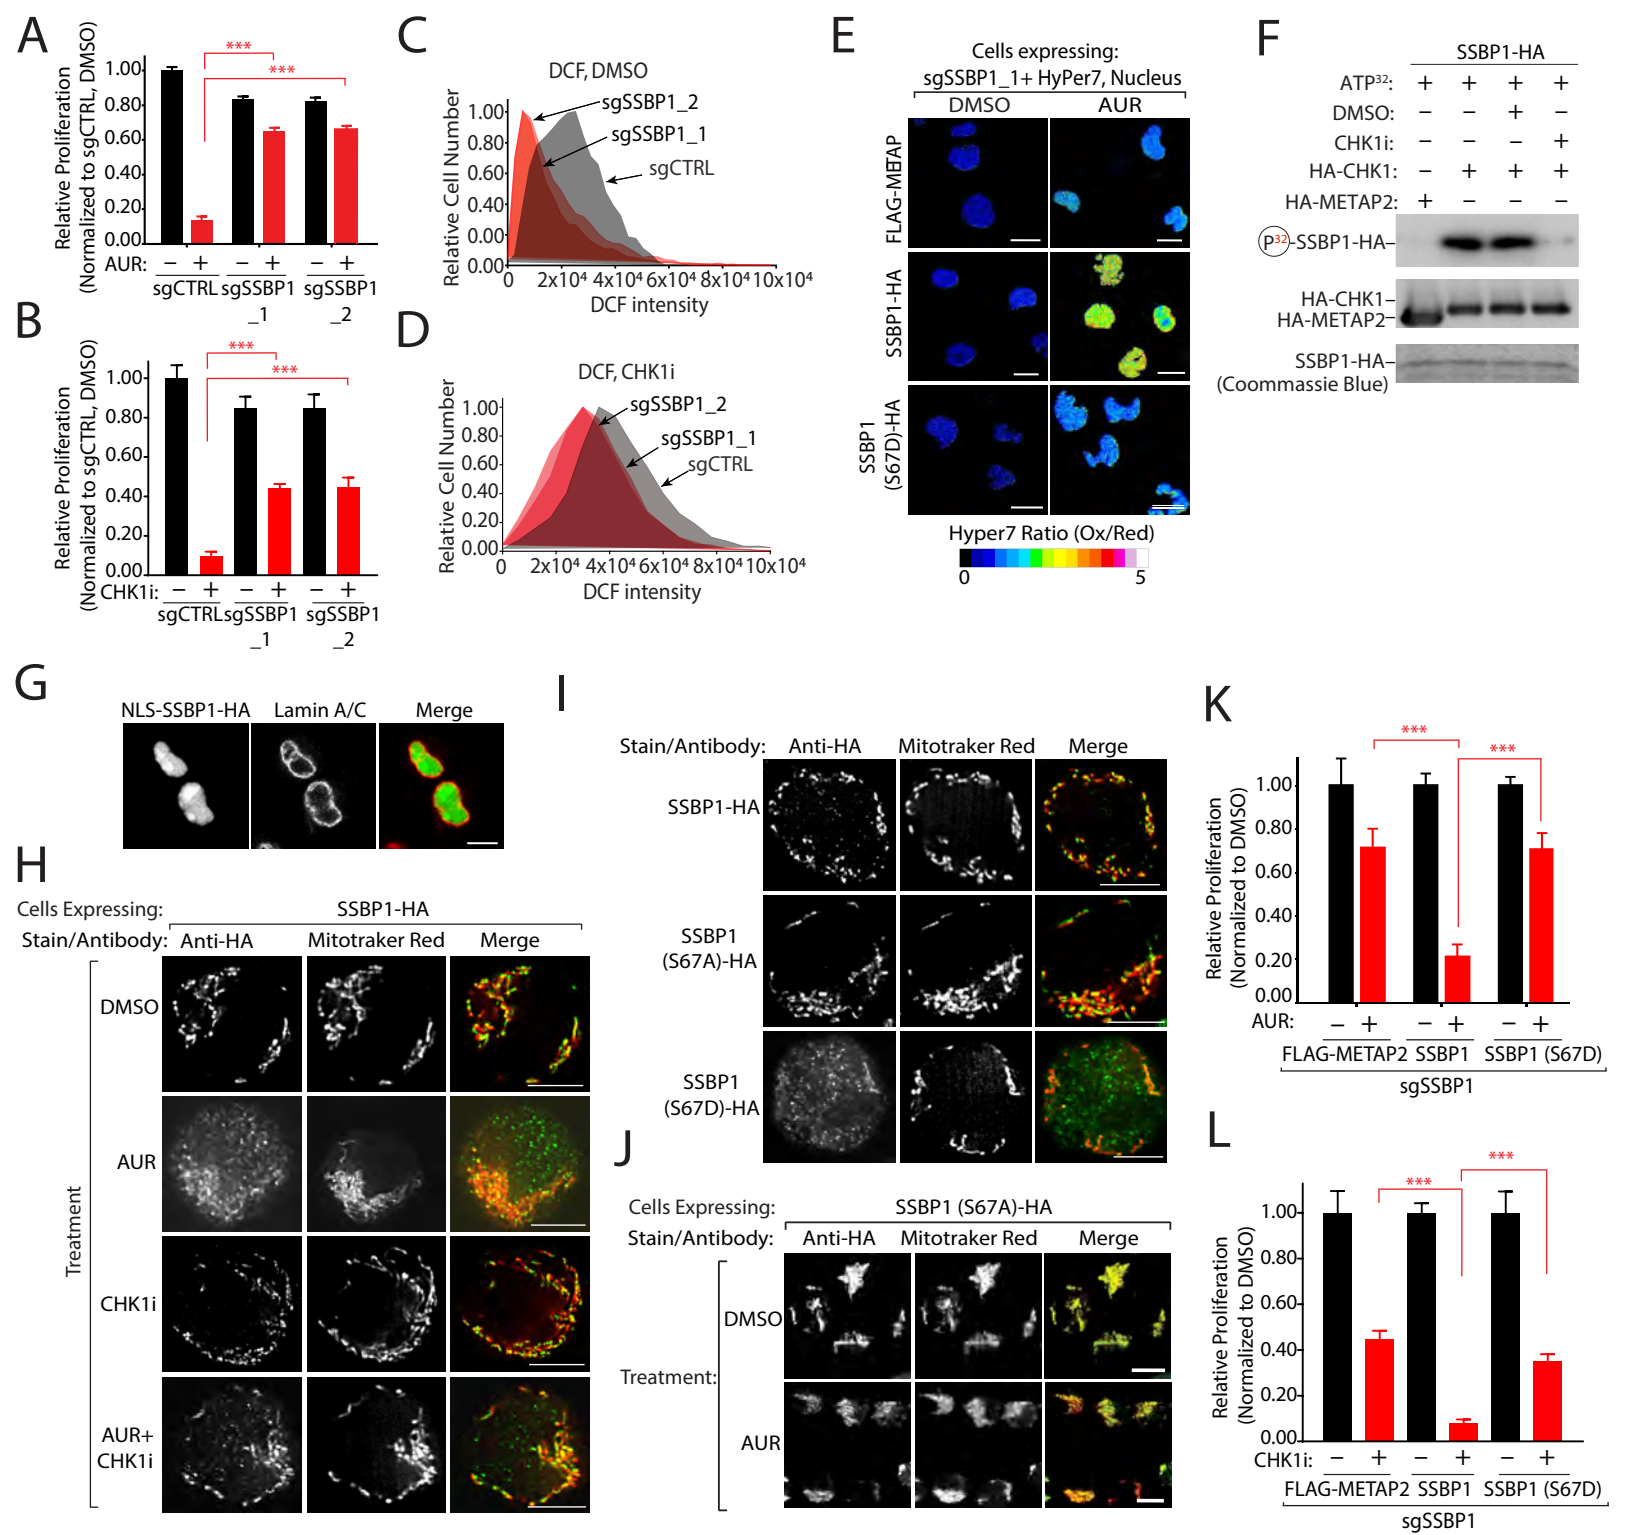

Supplement: NIHMS1894815-supplement-5.pdf [file NIHMS1894815-supplement-5.pdf]

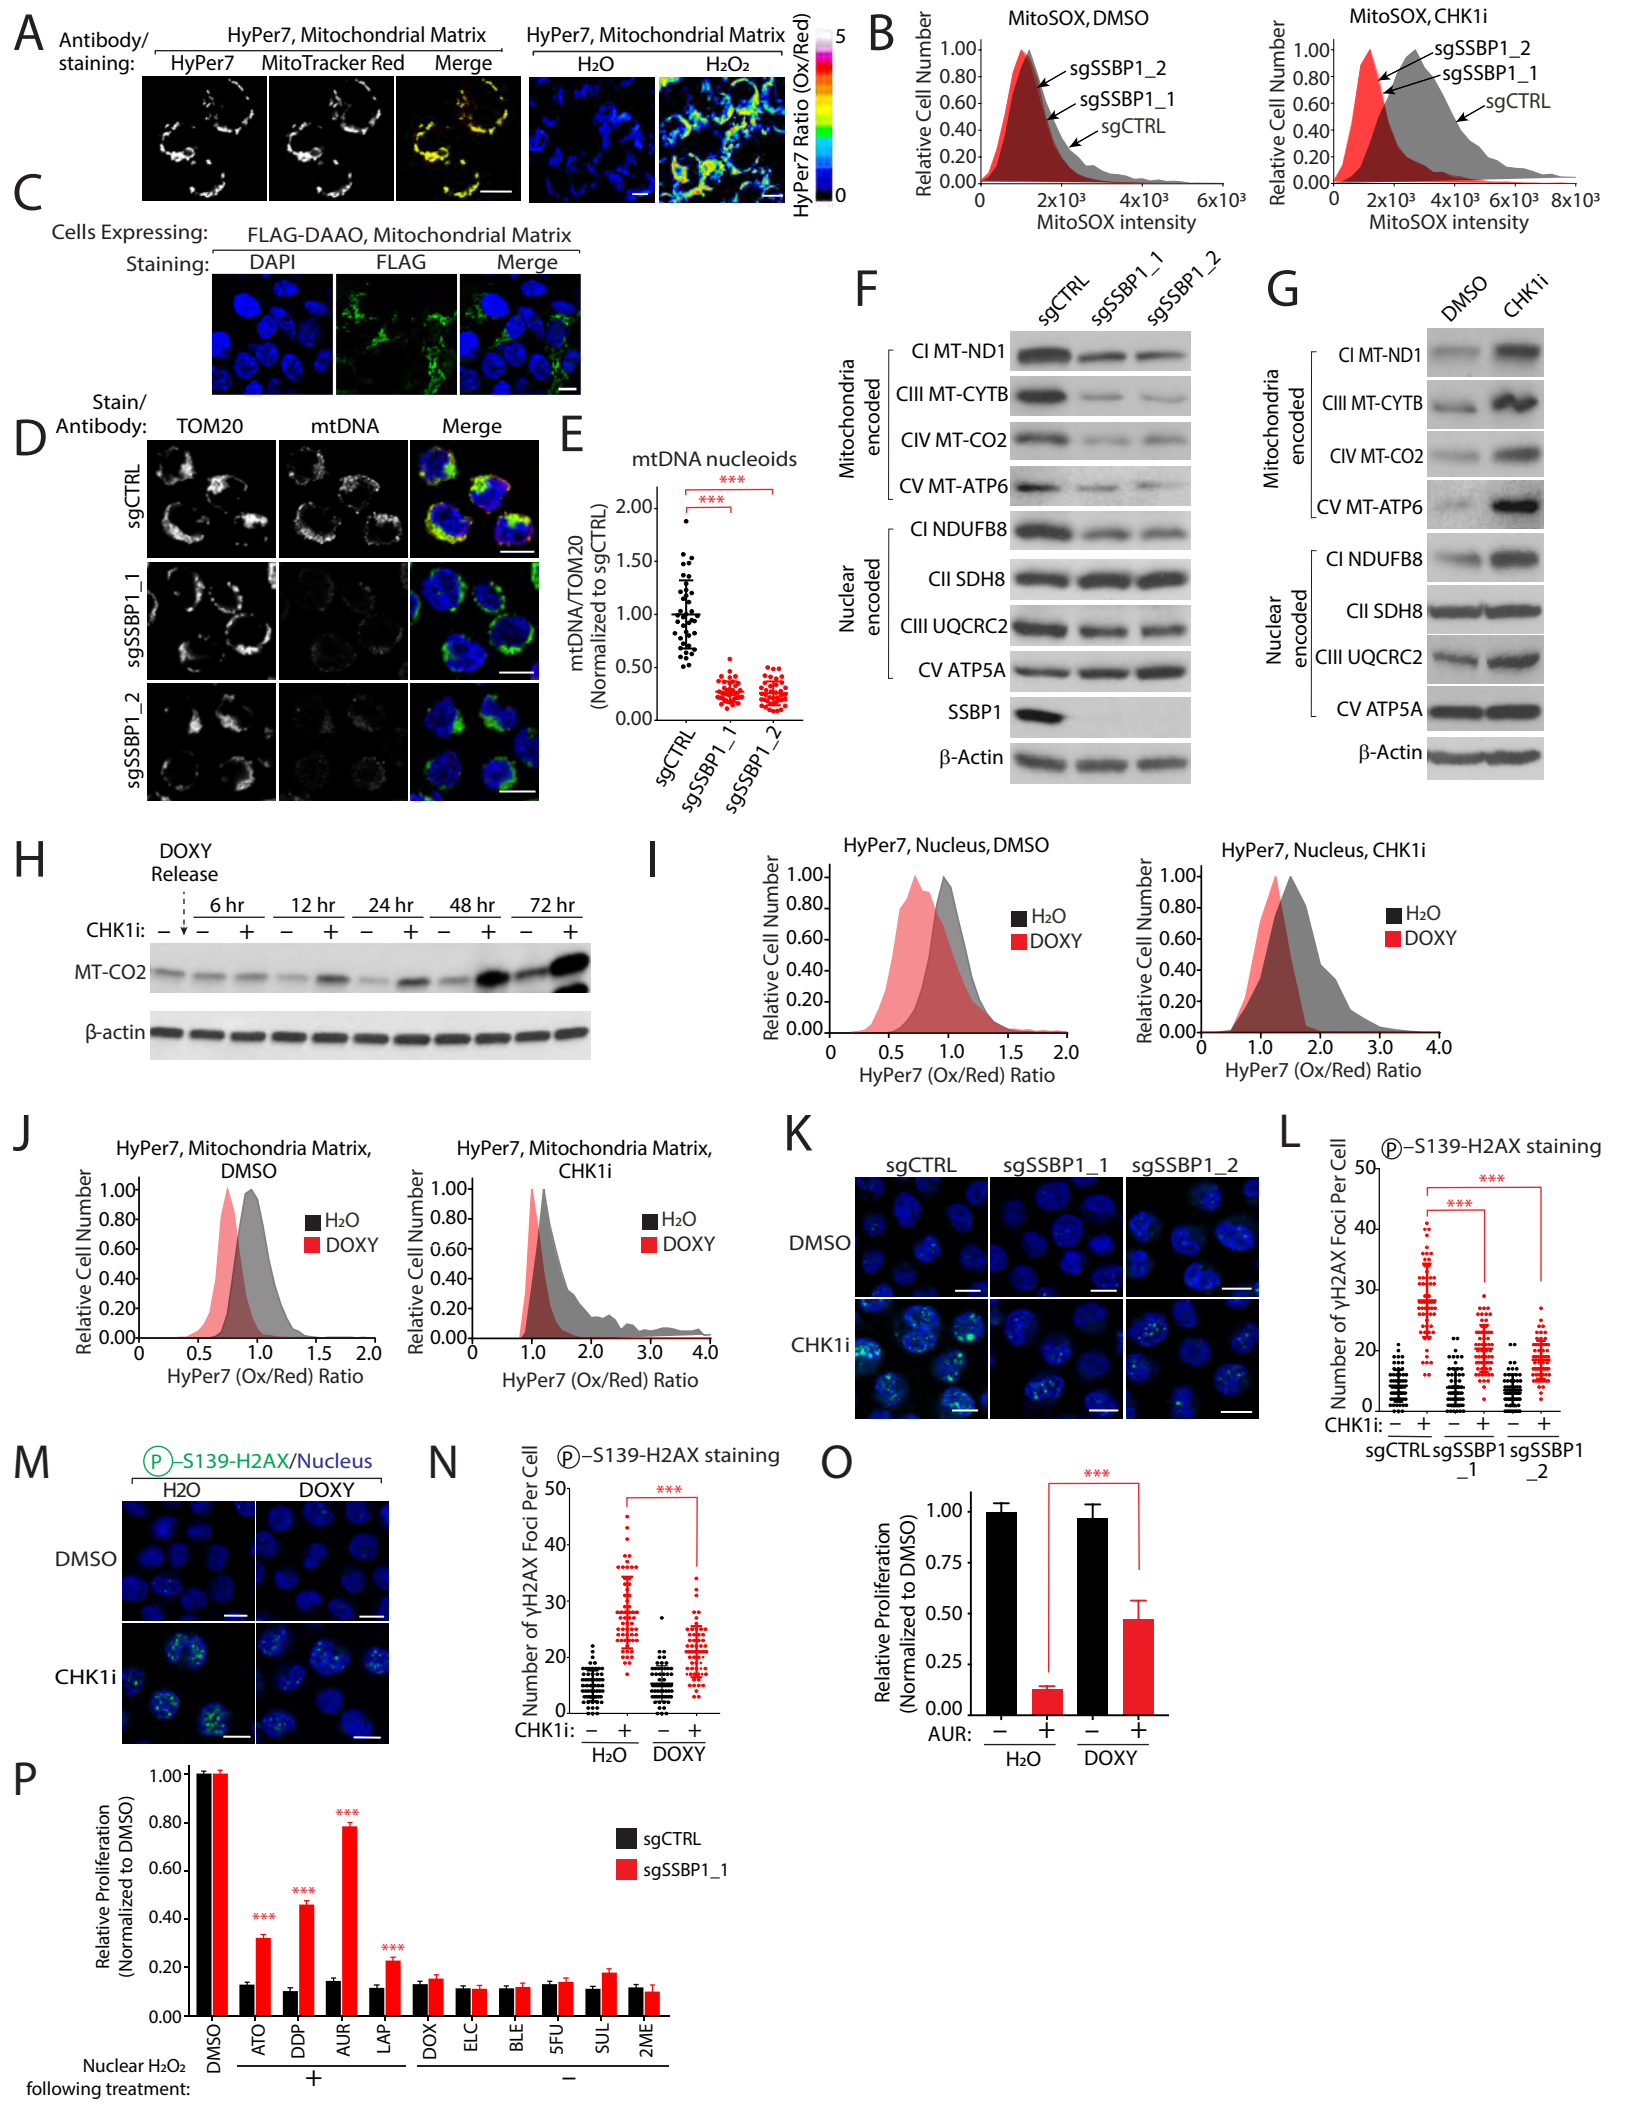

Supplement: NIHMS1894815-supplement-6.pdf [file NIHMS1894815-supplement-6.pdf]

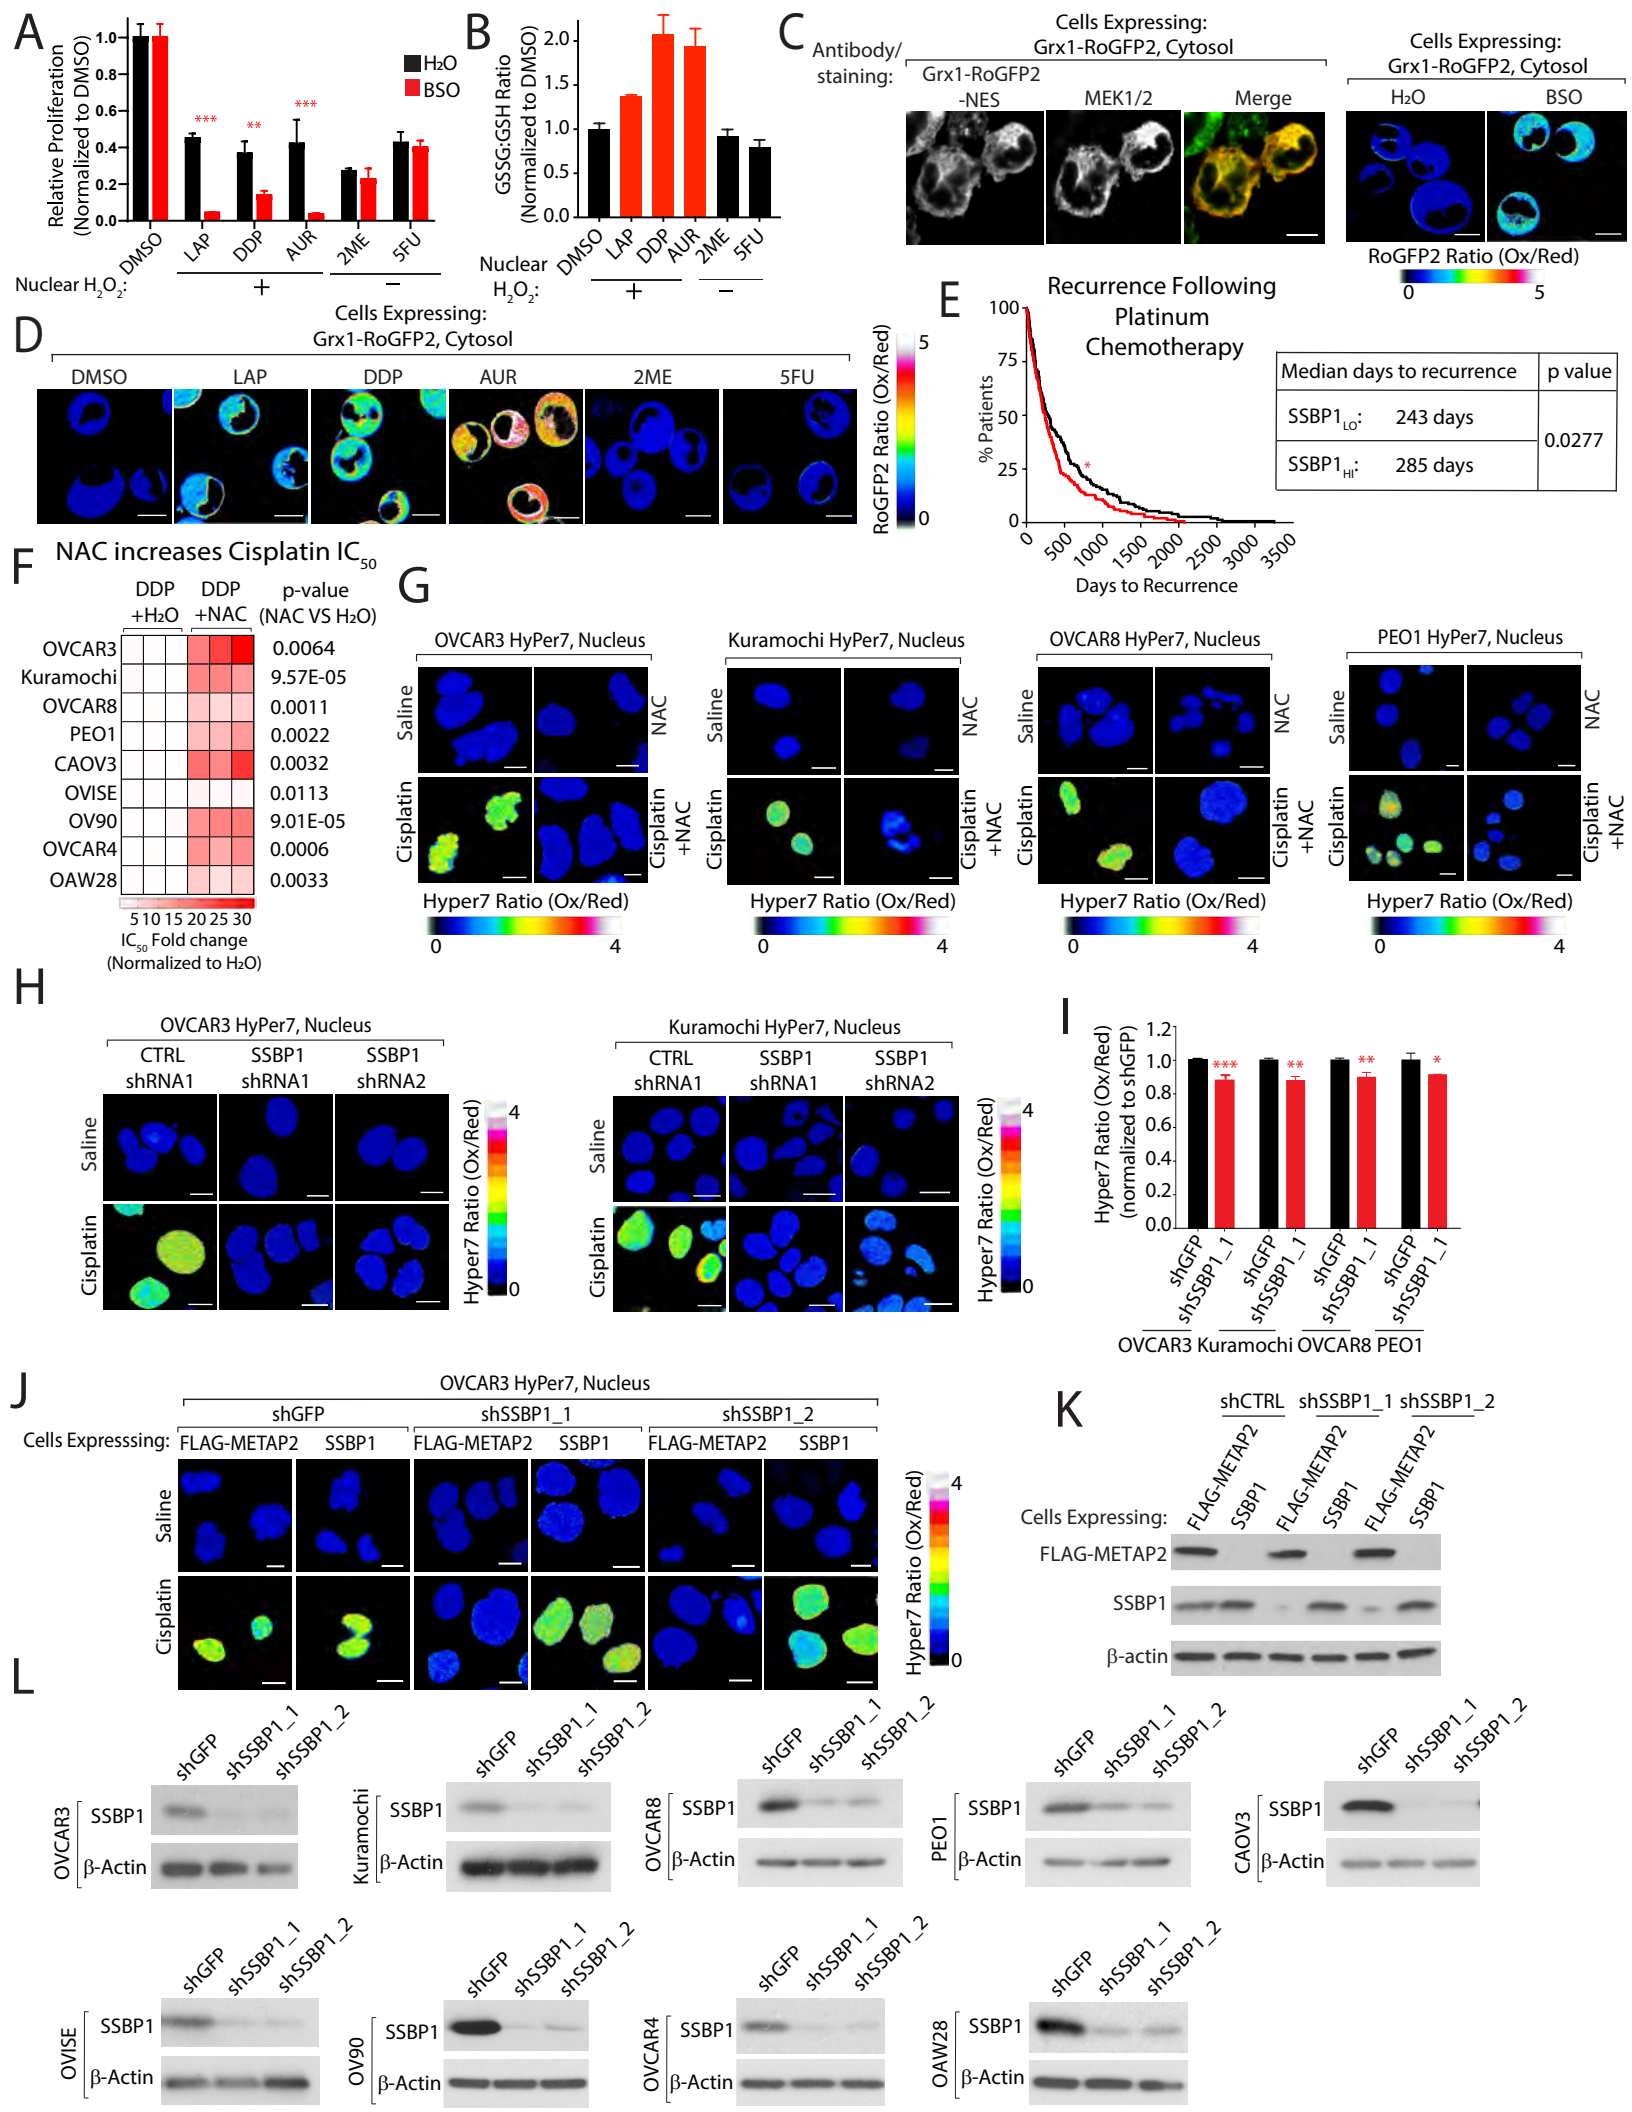

Supplement: NIHMS1894815-supplement-7.pdf [file NIHMS1894815-supplement-7.pdf]
